# Supplementary material for: Genetic Localization and Homologous Genes Mining for Barley Grain Size
Source: MDPI journal article supplement (doi:10.3390/ijms24054932), 2023-03-03
Supplement: s1 [file s1]

**Table S1.** Genetic correspondence between barley and other cereal genes controlling grain development.

| Orthologs              | Collinearity | Morex_ID                  | Accession number   | Description                                              | Reference |
|------------------------|--------------|---------------------------|--------------------|----------------------------------------------------------|-----------|
| <i>HvGSN1</i>          |              | HORVU.MOREX.r3.1HG0008520 | Os05g0115800       | Dual specificity phosphatase                             | [47]      |
| <i>HvRSR1</i>          |              | HORVU.MOREX.r3.1HG0012250 | Os05g0121600       | AP2-like ethylene-responsive transcription factor        | [48]      |
| <i>HvAPG</i>           | yes          | HORVU.MOREX.r3.1HG0018510 | Os05g0139100       | Basic helix-loop-helix transcription factor              | [93]      |
| <i>HvPPKL2</i>         | yes          | HORVU.MOREX.r3.1HG0019870 | Os05g0144400       | Serine/threonine-protein phosphatase                     | [73]      |
| <i>HvTaPGS1</i>        | yes          | HORVU.MOREX.r3.1HG0021280 | TraesCS1D02G094000 | Transcription factor basic helix-loop-helix              | [94]      |
| <i>HvSRS3</i>          | yes          | HORVU.MOREX.r3.1HG0023370 | Os05g0154700       | Kinesin-like protein                                     | [95]      |
| <i>HvGSK2</i>          |              | HORVU.MOREX.r3.1HG0030650 | Os05g0207500       | Kinase family protein                                    | [96]      |
| <i>HvAGSW1</i>         |              | HORVU.MOREX.r3.1HG0036390 | Os05g0323800       | ABC1-like kinase                                         | [97]      |
| <i>HvBSK2</i>          | yes          | HORVU.MOREX.r3.1HG0052470 | Os10g0571300       | Serine/threonine-protein kinase BSK2                     | [49]      |
| <i>HvSM1</i>           | yes          | HORVU.MOREX.r3.1HG0058550 | Os05g0389000       | AP2-like ethylene-responsive transcription factor        | [52]      |
| <i>HvLAC1</i>          |              | HORVU.MOREX.r3.1HG0073500 | Os05g0458600       | Laccase                                                  | [98]      |
| <i>HvSLG</i>           |              | HORVU.MOREX.r3.1HG0076820 | Os08g0562500       | HXXXD-type acyl-transferase family protein               | [53]      |
| <i>HvO2</i>            |              | HORVU.MOREX.r3.1HG0078350 | Zm00001eb301570    | Basic-leucine zipper (BZIP) transcription factor family  | [99]      |
| <i>Hvmyr1-1</i>        |              | HORVU.MOREX.r3.1HG0081040 | Zm00001eb354390    | MYB-related transcription factor                         | [100]     |
| <i>Hvincw1-1</i>       |              | HORVU.MOREX.r3.1HG0087260 | Zm00001eb242820    | Cell wall invertase                                      | [57]      |
| <i>HvIKU2-1</i>        |              | HORVU.MOREX.r3.1HG0088480 | At3g19700          | Leucine-rich repeat receptor-like protein kinase         | [72]      |
| <i>HvEF3.2</i>         | yes          | HORVU.MOREX.r3.1HG0095050 | Os01g0566100       | Early flowering 3                                        | [101]     |
| <i>HvSDG725</i>        |              | HORVU.MOREX.r3.2HG0096180 | Os02g0554000       | Histone-lysine N-methyltransferase                       | [58]      |
| <i>HvFZP</i>           | yes          | HORVU.MOREX.r3.2HG0114260 | Os07g0669500       | Ethylene-responsive transcription factor                 | [102]     |
| <i>HvMADS87-1</i>      |              | HORVU.MOREX.r3.2HG0119930 | Os03g0582400       | AGAMOUS-like MADS-box protein                            | [103]     |
| <i>HvMADS87-2</i>      |              | HORVU.MOREX.r3.2HG0119950 | Os03g0582400       | AGAMOUS-like MADS-box protein                            | [103]     |
| <i>HvTaSus2-2B</i>     | yes          | HORVU.MOREX.r3.2HG0124890 | TraesCS2B02G194200 | Sucrose synthase                                         | [104]     |
| <i>HvDEP2</i>          |              | HORVU.MOREX.r3.2HG0125030 | Os07g0616000       | Erect panicle 2 protein                                  | [105]     |
| <i>HvGW7</i>           | yes          | HORVU.MOREX.r3.2HG0126960 | Os07g0603300       | Longifolia protein                                       | [106,107] |
| <i>HvGE</i>            | yes          | HORVU.MOREX.r3.2HG0127090 | Os07g0603700       | Cytochrome P450 protein                                  | [108]     |
| <i>HvBZR1</i>          | yes          | HORVU.MOREX.r3.2HG0131380 | Os07g0580500       | BES1/BZR1 homolog 1                                      | [109]     |
| <i>HvRPT2A-1</i>       |              | HORVU.MOREX.r3.2HG0139190 | At4g29040          | 26S protease regulatory subunit                          | [110]     |
| <i>HvSPL13</i>         | yes          | HORVU.MOREX.r3.2HG0142950 | Os07g0505200       | Squamosa promoter-binding protein                        | [7]       |
| <i>HvANT-1</i>         |              | HORVU.MOREX.r3.2HG0154350 | At4g37750          | AP2-like ethylene-responsive transcription factor        | [111]     |
| <i>HvGIF1</i>          | yes          | HORVU.MOREX.r3.2HG0166450 | Os04g0413500       | Cell wall invertase                                      | [112]     |
| <i>HvTabas1-B1</i>     | yes          | HORVU.MOREX.r3.2HG0167220 | TraesCS2B02G313700 | Peroxioredoxin                                           | [113]     |
| <i>HvD11</i>           |              | HORVU.MOREX.r3.2HG0174520 | Os04g0469800       | Cytochrome P450 protein                                  | [114]     |
| <i>HvCyclin-T1;3-1</i> |              | HORVU.MOREX.r3.2HG0176090 | Os11g0157100       | Cyclin family protein                                    | [115]     |
| <i>HvLABA1</i>         | yes          | HORVU.MOREX.r3.2HG0182190 | Os04g0518800       | Cytokinin riboside 5'-monophosphate phosphoribohydrolase | [116]     |
| <i>HvEXPA10</i>        |              | HORVU.MOREX.r3.2HG0185850 | Os04g0583500       | Expansin                                                 | [117]     |
| <i>HvXIAO</i>          | yes          | HORVU.MOREX.r3.2HG0186650 | Os04g0576900       | Non-specific serine/threonine protein kinase             | [118]     |

|                               |     |                           |                 |                                                                 |          |
|-------------------------------|-----|---------------------------|-----------------|-----------------------------------------------------------------|----------|
| <i>Hv</i> nk1-1               | yes | HORVU.MOREX.r3.2HG0187780 | Zm00001eb073830 | Zinc finger protein, putative                                   | [119]    |
| <i>Hv</i> SMG2                | yes | HORVU.MOREX.r3.2HG0188270 | Os04g0559800    | Protein kinase                                                  | [120]    |
| <i>Hv</i> SPL33               |     | HORVU.MOREX.r3.2HG0194480 | Os01g0116600    | Elongation factor 1-alpha, putative                             | [121]    |
| <i>Hv</i> Zm-INVINH1-1        | yes | HORVU.MOREX.r3.2HG0196570 | Zm00001eb072630 | Invertase inhibitor                                             | [122]    |
| <i>Hv</i> Zm-INVINH1-2        |     | HORVU.MOREX.r3.2HG0196590 | Zm00001eb072630 | Invertase inhibitor                                             | [122]    |
| <i>Hv</i> Zm-INVINH1-3        |     | HORVU.MOREX.r3.2HG0196600 | Zm00001eb072630 | Invertase inhibitor                                             | [122]    |
| <i>Hv</i> Zm-INVINH1-4        |     | HORVU.MOREX.r3.2HG0196610 | Zm00001eb072630 | Invertase inhibitor                                             | [122]    |
| <i>Hv</i> Zm-INVINH1-5        |     | HORVU.MOREX.r3.2HG0196620 | Zm00001eb072630 | Invertase inhibitor                                             | [122]    |
| <i>Hv</i> Zm-INVINH1-6        |     | HORVU.MOREX.r3.2HG0196630 | Zm00001eb072630 | Invertase/pectin methylesterase inhibitor family protein        | [122]    |
| <i>Hv</i> AP2                 |     | HORVU.MOREX.r3.2HG0204770 | At4g36920       | AP2-like ethylene-responsive transcription factor               | [123]    |
| <i>Hv</i> FLO2                | yes | HORVU.MOREX.r3.2HG0205380 | Os04g0645100    | Clustered mitochondria protein                                  | [124]    |
| <i>Hv</i> ZmAFL4              | yes | HORVU.MOREX.r3.2HG0210050 | Zm00001eb066270 | B3 domain transcription factor                                  | [125]    |
| <i>Hv</i> RAG2                |     | HORVU.MOREX.r3.2HG0212810 | Os07g0214300    | Dimeric alpha-amylase inhibitor                                 | [126]    |
| <i>Hv</i> BSK3                | yes | HORVU.MOREX.r3.2HG0214020 | Os04g0684200    | Kinase family protein                                           | [127]    |
| <i>Hv</i> CKX2-1              |     | HORVU.MOREX.r3.3HG0236930 | At2g19500       | Cytokinin oxidase/dehydrogenase                                 | [76,128] |
| <i>Hv</i> MADS87-3            |     | HORVU.MOREX.r3.3HG0244110 | Os03g0582400    | AGAMOUS-like MADS-box protein                                   | [103]    |
| <i>Hv</i> Gn1a/CKX2-1         | yes | HORVU.MOREX.r3.3HG0244570 | Os01g0197700    | Cytokinin oxidase/dehydrogenase                                 | [129]    |
| <i>Hv</i> Gn1a/CKX2-2         |     | HORVU.MOREX.r3.3HG0244590 | Os01g0197700    | Cytokinin oxidase/dehydrogenase                                 | [129]    |
| <i>Hv</i> RDD1                | yes | HORVU.MOREX.r3.3HG0255050 | Os01g0264000    | Dof zinc finger protein                                         | [130]    |
| <i>Hv</i> FBK12-1             | yes | HORVU.MOREX.r3.3HG0255740 | Os03g0171600    | Kelch repeat-containing protein                                 | [131]    |
| <i>Hv</i> HB46                | yes | HORVU.MOREX.r3.3HG0275220 | Zm00001eb158680 | Homeobox associated leucine zipper protein                      | [132]    |
| <i>Hv</i> emp16               | yes | HORVU.MOREX.r3.3HG0279170 | Zm00001eb359970 | Pentatricopeptide repeat-containing protein                     | [133]    |
| <i>Hv</i> D61                 |     | HORVU.MOREX.r3.3HG0285210 | Os01g0718300    | Receptor kinase                                                 | [66]     |
| <i>Hv</i> BG1-1               | yes | HORVU.MOREX.r3.3HG0294270 | Os03g0175800    | Protein BIG GRAIN 1                                             | [134]    |
| <i>Hv</i> ABI5                |     | HORVU.MOREX.r3.3HG0300770 | At2g36270       | BZIP transcription factor                                       | [77]     |
| <i>Hv</i> DET2                | yes | HORVU.MOREX.r3.3HG0301780 | At2g38050       | 3-oxo-5-alpha-steroid 4-dehydrogenase family protein, expressed | [82]     |
| <i>Hv</i> ABI3/ <i>Hv</i> VP1 | yes | HORVU.MOREX.r3.3HG0308890 | Zm00001eb143690 | Transcription factor viviparous 1                               | [135]    |
| <i>Hv</i> AHKs-1              |     | HORVU.MOREX.r3.3HG0310920 | At1g27320       | Histidine kinase                                                | [136]    |
| <i>Hv</i> RPT2A-2             |     | HORVU.MOREX.r3.3HG0311570 | At4g29040       | 26S protease regulatory subunit                                 | [110]    |
| <i>Hv</i> ARF4-1              | yes | HORVU.MOREX.r3.3HG0312310 | Os01g0927600    | Auxin response factor                                           | [83]     |
| <i>Hv</i> ARF4-2              |     | HORVU.MOREX.r3.3HG0313110 | Os01g0927600    | Auxin response factor                                           | [83]     |
| <i>Hv</i> BDG1                |     | HORVU.MOREX.r3.3HG0317920 | Os11g0514400    | Leucine-rich repeat receptor-like kinase                        | [137]    |
| <i>Hv</i> SNG1/HXK3           |     | HORVU.MOREX.r3.3HG0318700 | Os01g0940100    | Phosphotransferase                                              | [138]    |
| <i>Hv</i> emp5                |     | HORVU.MOREX.r3.3HG0323440 | Zm00001eb140440 | Pentatricopeptide repeat-containing protein                     | [139]    |
| <i>Hv</i> RGB1                |     | HORVU.MOREX.r3.4HG0333750 | Os03g0669100    | Deoxyuridine 5'-triphosphate nucleotidohydrolase                | [67]     |
| <i>Hv</i> dek35               | yes | HORVU.MOREX.r3.4HG0337450 | Zm00001eb055010 | Pentatricopeptide repeat-containing protein                     | [68]     |
| <i>Hv</i> AHKs-2              | yes | HORVU.MOREX.r3.4HG0337770 | At2g01830       | Histidine kinase                                                | [136]    |
| <i>Hv</i> emp4                | yes | HORVU.MOREX.r3.4HG0339220 | Zm00001eb055980 | Pentatricopeptide repeat-containing protein                     | [70]     |

|                        |     |                           |                    |                                                             |       |
|------------------------|-----|---------------------------|--------------------|-------------------------------------------------------------|-------|
| <i>HvDAR1</i>          |     | HORVU.MOREX.r3.4HG0341060 | At4g36860          | Protein DA1-related 1                                       | [11]  |
| <i>HvTaSnRK2.10</i>    | yes | HORVU.MOREX.r3.4HG0342860 | TraesCS4A02G235600 | Kinase family protein                                       | [140] |
| <i>Hvsmk1</i>          |     | HORVU.MOREX.r3.4HG0345720 | Zm00001eb110890    | Pentatricopeptide repeat-containing protein                 | [141] |
| <i>HvCyclin-T1;3-2</i> |     | HORVU.MOREX.r3.4HG0350880 | Os11g0157100       | Cyclin family protein                                       | [115] |
| <i>HvSOD7/NGAL2-1</i>  |     | HORVU.MOREX.r3.4HG0351290 | At3g11580          | B3 domain-containing protein                                | [142] |
| <i>HvEOD1/BB</i>       |     | HORVU.MOREX.r3.4HG0384230 | At3g63530          | RING/U-box superfamily protein                              | [143] |
| <i>HvHDR3</i>          | yes | HORVU.MOREX.r3.4HG0389200 | Os03g0267800       | LIM domain-containing protein 1                             | [144] |
| <i>HvANT-2</i>         |     | HORVU.MOREX.r3.4HG0394710 | At4g37750          | AP2-like ethylene-responsive transcription factor           | [111] |
| <i>HvTUD1</i>          | yes | HORVU.MOREX.r3.4HG0394810 | Os03g0232600       | U-box domain-containing protein                             | [145] |
| <i>HvTaGS-4B</i>       | yes | HORVU.MOREX.r3.4HG0395540 | TraesCS4B02G240900 | Glutamine synthetase                                        | [146] |
| <i>HvD14-1</i>         |     | HORVU.MOREX.r3.4HG0398570 | Os03g0203200       | Sigma factor sigB regulation protein rsbQ                   | [147] |
| <i>HvPGL1</i>          | yes | HORVU.MOREX.r3.4HG0403680 | Os03g0171300       | Transcription factor protein                                | [148] |
| <i>HvFBK12-2</i>       |     | HORVU.MOREX.r3.4HG0403700 | Os03g0171600       | Kelch repeat-containing protein                             | [131] |
| <i>Hvsmk2-1</i>        |     | HORVU.MOREX.r3.4HG0404270 | Zm00001eb208970    | Pyridoxal 5'-phosphate synthase subunit PdxT                | [149] |
| <i>HvBG1-2</i>         |     | HORVU.MOREX.r3.4HG0404460 | Os03g0175800       | Protein BIG GRAIN 1                                         | [134] |
| <i>HvANT-3</i>         |     | HORVU.MOREX.r3.4HG0404560 | At4g37750          | AP2-like ethylene-responsive transcription factor           | [111] |
| <i>HvLG3</i>           |     | HORVU.MOREX.r3.4HG0405650 | Os03g0183000       | Ethylene-responsive transcription factor                    | [150] |
| <i>HvEXPLA1-1</i>      | yes | HORVU.MOREX.r3.4HG0409710 | Os03g0132200       | Expansin-like protein                                       | [151] |
| <i>HvEXPLA1-2</i>      |     | HORVU.MOREX.r3.4HG0409760 | Os03g0132200       | Expansin-like protein                                       | [151] |
| <i>HvEXPLA1-3</i>      |     | HORVU.MOREX.r3.4HG0409870 | Os03g0132200       | Expansin-like protein                                       | [151] |
| <i>HvCDPK1</i>         | yes | HORVU.MOREX.r3.4HG0410700 | Os03g0128700       | Calcium dependent protein kinase                            | [152] |
| <i>Hvprog1-1</i>       |     | HORVU.MOREX.r3.4HG0411810 | Os07g0153600       | Zinc finger protein, putative                               | [153] |
| <i>Hvprog1-2</i>       |     | HORVU.MOREX.r3.4HG0411820 | Os07g0153600       | Zinc finger protein, putative                               | [153] |
| <i>Hvprog1-3</i>       |     | HORVU.MOREX.r3.4HG0411840 | Os07g0153600       | Zinc finger protein, putative                               | [153] |
| <i>HvMRP5</i>          |     | HORVU.MOREX.r3.4HG0412040 | Os03g0142800       | Multidrug resistance protein ABC transporter family protein | [154] |
| <i>HvCCS52A</i>        | yes | HORVU.MOREX.r3.4HG0412380 | Os03g0123300       | WD-repeat protein, putative                                 | [155] |
| <i>Hvprog1-4</i>       |     | HORVU.MOREX.r3.4HG0413540 | Os07g0153600       | Zinc finger protein, putative                               | [153] |
| <i>Hvincw1-2</i>       |     | HORVU.MOREX.r3.4HG0413910 | Zm00001eb242820    | Cell wall invertase                                         | [57]  |
| <i>HvIKU2-2</i>        |     | HORVU.MOREX.r3.5HG0421310 | At3g19700          | Receptor protein kinase, putative                           | [72]  |
| <i>HvPPKL3</i>         | yes | HORVU.MOREX.r3.5HG0426290 | Os12g0617900       | Serine/threonine-protein phosphatase                        | [73]  |
| <i>Hvcr4-1</i>         |     | HORVU.MOREX.r3.5HG0429770 | Zm00001eb406780    | Kinase family protein                                       | [156] |
| <i>HvDA1</i>           |     | HORVU.MOREX.r3.5HG0436650 | At1g19270          | Protein DA1-related 1                                       | [157] |
| <i>HvTaSnRK2.9-5A</i>  | yes | HORVU.MOREX.r3.5HG0438740 | TraesCS5A02G069500 | Kinase family protein                                       | [158] |
| <i>HvSOD7/NGAL2-2</i>  |     | HORVU.MOREX.r3.5HG0458770 | At3g11580          | B3 domain-containing protein                                | [142] |
| <i>HvCEN2/RCN1</i>     | yes | HORVU.MOREX.r3.5HG0460080 | Os11g0152500       | Putative phosphatidylethanolamine-binding protein           | [159] |
| <i>Hvwri1</i>          | yes | HORVU.MOREX.r3.5HG0463120 | Zm00001eb093560    | AP2-like ethylene-responsive transcription factor           | [160] |
| <i>HvTTG2</i>          |     | HORVU.MOREX.r3.5HG0466860 | At2g37260          | WRKY transcription factor                                   | [161] |
| <i>HvBC12</i>          |     | HORVU.MOREX.r3.5HG0468240 | Os09g0114500       | Kinesin-like protein                                        | [162] |

|                   |            |                           |                    |                                                               |           |
|-------------------|------------|---------------------------|--------------------|---------------------------------------------------------------|-----------|
| <i>HvDEP1</i>     | <i>yes</i> | HORVU.MOREX.r3.5HG0480200 | Os09g0441900       | Guanine nucleotide-binding protein subunit gamma 3            | [163]     |
| <i>HvFBK12-3</i>  |            | HORVU.MOREX.r3.5HG0481140 | Os03g0171600       | Kelch repeat-containing protein                               | [131]     |
| <i>HvGS9</i>      | <i>yes</i> | HORVU.MOREX.r3.5HG0485690 | Os09g0448500       | Protein XRI1                                                  | [164]     |
| <i>HvSG1</i>      | <i>yes</i> | HORVU.MOREX.r3.5HG0486680 | Os09g0459200       | BEST plant protein match is: (TAIR:plant.1) protein, putative | [165]     |
| <i>Hvemp6</i>     | <i>yes</i> | HORVU.MOREX.r3.5HG0488360 | Zm00001eb101330    | Ubiquitin carboxyl-terminal hydrolase family protein          | [166]     |
| <i>HvBC1</i>      | <i>yes</i> | HORVU.MOREX.r3.5HG0495090 | Os09g0510500       | basic helix-loop-helix (bHLH) DNA-binding superfamily protein | [167]     |
| <i>HvD14-2</i>    |            | HORVU.MOREX.r3.5HG0505590 | Os03g0203200       | Sigma factor sigB regulation protein rsbQ                     | [147]     |
| <i>HvGL3.1</i>    | <i>yes</i> | HORVU.MOREX.r3.5HG0508080 | Os03g0646900       | Serine/threonine-protein phosphatase                          | [115,168] |
| <i>Hvemp10</i>    | <i>yes</i> | HORVU.MOREX.r3.5HG0510080 | Zm00001eb057030    | Pentatricopeptide repeat-containing protein, putative         | [169]     |
| <i>HvMPPR6</i>    | <i>yes</i> | HORVU.MOREX.r3.5HG0512500 | Zm00001eb058140    | Pentatricopeptide repeat protein                              | [170]     |
| <i>HvANT-4</i>    |            | HORVU.MOREX.r3.5HG0513410 | At4g37750          | AP2-like ethylene-responsive transcription factor             | [111]     |
| <i>Hvdek36</i>    |            | HORVU.MOREX.r3.5HG0515060 | Zm00001eb213580    | Ribose-5-phosphate isomerase A                                | [171]     |
| <i>HvDST</i>      |            | HORVU.MOREX.r3.5HG0516880 | Os03g0786400       | Zinc finger protein, putative                                 | [76]      |
| <i>HvABA2</i>     |            | HORVU.MOREX.r3.5HG0524120 | At1g52340          | Short-chain dehydrogenase/reductase                           | [77]      |
| <i>HvNaPRT1</i>   | <i>yes</i> | HORVU.MOREX.r3.5HG0530510 | Os03g0837300       | Nicotinate phosphoribosyltransferase, putative, expressed     | [172]     |
| <i>HvGL3.3</i>    | <i>yes</i> | HORVU.MOREX.r3.5HG0532220 | Os03g0841800       | Protein kinase                                                | [83]      |
| <i>Hvemb14</i>    |            | HORVU.MOREX.r3.6HG0541050 | Zm00001eb209870    | Nitric oxide synthase 1                                       | [173,174] |
| <i>HvMADS87-4</i> |            | HORVU.MOREX.r3.6HG0541730 | Os03g0582400       | AGAMOUS-like MADS-box protein                                 | [103]     |
| <i>Hvsmk2-2</i>   |            | HORVU.MOREX.r3.6HG0552540 | Zm00001eb208970    | Pyridoxal 5'-phosphate synthase subunit PdxT                  | [149]     |
| <i>Hvdek10</i>    |            | HORVU.MOREX.r3.6HG0566240 | Zm00001eb207310    | Pentatricopeptide repeat-containing protein                   | [175]     |
| <i>HvSPL4</i>     | <i>yes</i> | HORVU.MOREX.r3.6HG0570860 | Os02g0174100       | Squamosa promoter-binding-like protein                        | [176]     |
| <i>HvMADS29</i>   | <i>yes</i> | HORVU.MOREX.r3.6HG0571720 | Os02g0170300       | MADS-box transcription factor                                 | [177]     |
| <i>HvBT1</i>      | <i>yes</i> | HORVU.MOREX.r3.6HG0578050 | Os02g0202400       | Mitochondrial carrier family                                  | [178]     |
| <i>HvCKX2-2</i>   |            | HORVU.MOREX.r3.6HG0579880 | At2g19500          | Cytokinin oxidase/dehydrogenase                               | [76,128]  |
| <i>HvCKX2-3</i>   |            | HORVU.MOREX.r3.6HG0579910 | At2g19500          | Cytokinin oxidase/dehydrogenase                               | [76,128]  |
| <i>HvGW2</i>      |            | HORVU.MOREX.r3.6HG0583520 | Os02g0244100       | Protein SIP5                                                  | [179]     |
| <i>HvFUWA</i>     |            | HORVU.MOREX.r3.6HG0585150 | Os02g0234200       | NHL repeat-containing protein                                 | [180]     |
| <i>Hvubl1</i>     | <i>yes</i> | HORVU.MOREX.r3.6HG0599760 | Zm00001eb249040    | U6 snRNA phosphodiesterase                                    | [181]     |
| <i>Hvnkd1-2</i>   | <i>yes</i> | HORVU.MOREX.r3.6HG0603120 | Zm00001eb073830    | Zinc finger protein, putative                                 | [119]     |
| <i>HvOcl1</i>     |            | HORVU.MOREX.r3.6HG0603410 | Zm00001eb126140    | Homeobox-leucine zipper protein                               | [182]     |
| <i>Hvcr4-2</i>    |            | HORVU.MOREX.r3.6HG0604180 | Zm00001eb406780    | Receptor protein kinase, putative                             | [156]     |
| <i>HvRAV6</i>     | <i>yes</i> | HORVU.MOREX.r3.6HG0604470 | Os02g0683500       | B3 domain-containing protein                                  | [183]     |
| <i>HvGS2</i>      | <i>yes</i> | HORVU.MOREX.r3.6HG0606810 | Os02g0701300       | Growth-regulating factor                                      | [184]     |
| <i>Hvdek1</i>     |            | HORVU.MOREX.r3.6HG0608170 | Zm00001eb014030    | Calpain-like protein                                          | [78]      |
| <i>HvLec1</i>     | <i>yes</i> | HORVU.MOREX.r3.6HG0611100 | Zm00001eb253260    | Nuclear transcription factor Y subunit B                      | [80]      |
| <i>HvTaGS1a</i>   | <i>yes</i> | HORVU.MOREX.r3.6HG0613270 | TraesCS6A02G298100 | Glutamine synthetase                                          | [185]     |
| <i>HvPGL2</i>     | <i>yes</i> | HORVU.MOREX.r3.6HG0615060 | Os02g0747900       | Transcription factor protein                                  | [148]     |
| <i>HvAHKs-3</i>   |            | HORVU.MOREX.r3.6HG0616300 | At2g01830          | Histidine kinase                                              | [136]     |

|                       |     |                           |                    |                                                               |           |
|-----------------------|-----|---------------------------|--------------------|---------------------------------------------------------------|-----------|
| <i>HvSMG1</i>         |     | HORVU.MOREX.r3.6HG0622200 | Os02g0787300       | Protein kinase                                                | [186]     |
| <i>Hvemb12</i>        | yes | HORVU.MOREX.r3.6HG0623680 | Zm00001eb257720    | Translation initiation factor IF-3                            | [187]     |
| <i>HvMADS87-5</i>     |     | HORVU.MOREX.r3.6HG0624300 | Os03g0582400       | AGAMOUS-like MADS-box protein                                 | [103]     |
| <i>HvMADS87-6</i>     |     | HORVU.MOREX.r3.6HG0624320 | Os03g0582400       | AGAMOUS-like MADS-box protein                                 | [103]     |
| <i>HvMADS87-7</i>     |     | HORVU.MOREX.r3.6HG0624330 | Os03g0582400       | AGAMOUS-like MADS-box protein                                 | [103]     |
| <i>HvMADS87-8</i>     |     | HORVU.MOREX.r3.6HG0624340 | Os03g0582400       | AGAMOUS-like MADS-box protein                                 | [103]     |
| <i>HvbHLH107</i>      | yes | HORVU.MOREX.r3.6HG0627040 | Os02g0805250       | basic helix-loop-helix (bHLH) DNA-binding superfamily protein | [188]     |
| <i>HvBLS1</i>         |     | HORVU.MOREX.r3.6HG0627710 | Os02g0811000       | LIGHT-DEPENDENT SHORT HYPOCOTYLS-like protein (DUF640)        | [189]     |
| <i>HvFBK12-4</i>      |     | HORVU.MOREX.r3.7HG0635000 | Os03g0171600       | Kelch repeat-containing protein                               | [131]     |
| <i>HvFBK12-5</i>      |     | HORVU.MOREX.r3.7HG0635090 | Os03g0171600       | Kelch repeat-containing protein                               | [131]     |
| <i>HvD1</i>           |     | HORVU.MOREX.r3.7HG0641160 | Os05g0333200       | Guanine nucleotide-binding protein subunit alpha-like protein | [190]     |
| <i>HvDLT</i>          | yes | HORVU.MOREX.r3.7HG0642830 | Os06g0127800       | Scarecrow transcription factor family protein                 | [191]     |
| <i>Hvde18</i>         |     | HORVU.MOREX.r3.7HG0647150 | Zm00001eb409250    | Flavin-containing monooxygenase, putative                     | [192]     |
| <i>HvMAPK6</i>        | yes | HORVU.MOREX.r3.7HG0652970 | Os06g0154500       | Mitogen-activated protein kinase                              | [193]     |
| <i>Hvmrp1-2</i>       |     | HORVU.MOREX.r3.7HG0653280 | Zm00001eb354390    | MYB-related transcription factor                              | [100]     |
| <i>HvHGW</i>          | yes | HORVU.MOREX.r3.7HG0654600 | Os06g0160400       | Proline-rich cell wall protein-like protein                   | [194]     |
| <i>Hvmrp1-3</i>       |     | HORVU.MOREX.r3.7HG0654760 | Zm00001eb354390    | MYB-related transcription factor                              | [100]     |
| <i>Hvmrp1-4</i>       |     | HORVU.MOREX.r3.7HG0656920 | Zm00001eb354390    | MYB-related transcription factor                              | [100]     |
| <i>Hvmrp1-5</i>       |     | HORVU.MOREX.r3.7HG0656940 | Zm00001eb354390    | MYB-related transcription factor                              | [100]     |
| <i>Hvppr2263</i>      | yes | HORVU.MOREX.r3.7HG0659520 | Zm00001eb374510    | Pentatricopeptide repeat-containing protein                   | [195]     |
| <i>Hvsh1</i>          |     | HORVU.MOREX.r3.7HG0661420 | Zm00001eb374090    | Sucrose synthase                                              | [196]     |
| <i>HvVRT-A2</i>       | yes | HORVU.MOREX.r3.7HG0664320 | TraesCS7A02G175200 | MADS box transcription factor                                 | [30,197]  |
| <i>HvBU1</i>          | yes | HORVU.MOREX.r3.7HG0666110 | Os06g0226500       | Transcription factor protein                                  | [198]     |
| <i>Hvmrp1-6</i>       |     | HORVU.MOREX.r3.7HG0666620 | Zm00001eb354390    | MYB-related transcription factor                              | [100]     |
| <i>HvWFP</i>          | yes | HORVU.MOREX.r3.7HG0679980 | Os08g0509600       | Squamosa promoter binding protein                             | [199,200] |
| <i>HvERF115</i>       | yes | HORVU.MOREX.r3.7HG0681130 | Os08g0521600       | Ethylene-responsive transcription factor                      | [201]     |
| <i>HvGW8</i>          | yes | HORVU.MOREX.r3.7HG0684000 | Os08g0531600       | Squamosa promoter binding-like protein                        | [202]     |
| <i>HvWTG1/HvOTUB1</i> | yes | HORVU.MOREX.r3.7HG0685210 | Os08g0537800       | Ubiquitin thioesterase                                        | [203]     |
| <i>HvASP- LSL</i>     |     | HORVU.MOREX.r3.7HG0695720 | Os08g0162100       | Topless-related protein 1                                     | [204]     |
| <i>HvTBP1</i>         |     | HORVU.MOREX.r3.7HG0697320 | Os08g0174700       | Receptor-like kinase                                          | [205]     |
| <i>Hvcr4-3</i>        |     | HORVU.MOREX.r3.7HG0699810 | Zm00001eb406780    | Kinase family protein                                         | [156]     |
| <i>HvFIE1</i>         |     | HORVU.MOREX.r3.7HG0702190 | Os08g0137250       | Fertilization independent endosperm 1 protein                 | [206]     |
| <i>HvCKX2-4</i>       |     | HORVU.MOREX.r3.7HG0716480 | At2g19500          | Cytokinin oxidase/dehydrogenase                               | [76,128]  |
| <i>HvTaMOC1</i>       | yes | HORVU.MOREX.r3.7HG0720900 | TraesCS7B02G285500 | GRAS transcription factor                                     | [207]     |
| <i>HvMADS87-9</i>     |     | HORVU.MOREX.r3.7HG0723860 | Os03g0582400       | MADS-box transcription factor family protein                  | [103]     |
| <i>Hvemp7</i>         |     | HORVU.MOREX.r3.7HG0727380 | Zm00001eb333280    | Pentatricopeptide repeat-containing protein                   | [208]     |
| <i>HvGW6a</i>         | yes | HORVU.MOREX.r3.7HG0742750 | Os06g0650300       | N-acetyltransferase, putative                                 | [209]     |
| <i>HvHOS59</i>        |     | HORVU.MOREX.r3.7HG0744200 | Os06g0646600       | Homeobox protein knotted-1, putative                          | [210]     |

|                    |                           |              |                                              |       |
|--------------------|---------------------------|--------------|----------------------------------------------|-------|
| <i>HvBRD2</i>      | HORVU.MOREX.r3.7HG0749940 | Os10g0397400 | Delta(24)-sterol reductase                   | [211] |
| <i>HvMADS87-10</i> | HORVU.MOREX.r3.7HG0751440 | Os03g0582400 | MADS-box transcription factor family protein | [103] |

---
